# Supplementary material for: Knowledge Networks in Organic Fruit Production across Europe: A Survey Study
Source: MDPI journal article supplement (doi:10.3390/su14052960), 2022-03-03
Supplement: s1 [file s1]

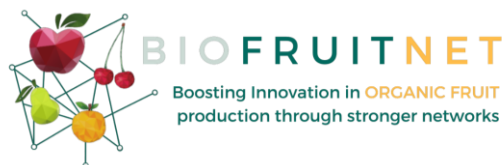

## QUESTIONNAIRE FOR MAPPING THE ORGANIC FRUITS KNOWLEDGE NETWORKS

### Definition of network

A network is a group of people composed by one or more kind of stakeholders (e.g. farmers, advisors, researchers, etc.) which is exchanging information on regular basis, either formally or informally.

**1) Country** (please specify) .....

**2) Network structure of the country** (describe whether there are more networks and how they are connected)

.....  
.....  
.....  
.....

### 3) Network data

Name of the network group .....

Type of network

- ☐ public
- ☐ private
- ☐ NGO
- ☐ Other: .....

Number of members .....

Website or address .....

Contact person (name and contacts)

.....  
.....  
.....  
.....



#### 4) Fruit crop/s the network is dealing with (select as needed)

- ☐ Pomefruits
  - ☐ Apple
  - ☐ Pear
- ☐ Stonefruits
  - ☐ Peach and nectarines
  - ☐ Plums
  - ☐ Cherries (sweet and sour)
  - ☐ Apricot
  - ☐ Almond
- ☐ Citrus
  - ☐ Oranges
  - ☐ Lemons/Limes
  - ☐ Mandarins/ Mandarins-like
  - ☐ Pomelo/Grapefruit
  - ☐ Tangerines
  - ☐ Others

#### 5) Territorial level of the network

- ☐ Network at international level
  - ☐ Members limited to Europe, please give MS .....
  - ☐ Members also out of Europe, please give country .....
- ☐ Network at national level
- ☐ Network at regional level

#### 6) Network management (mainly managed by)

- ☐ farmers
- ☐ advisors
- ☐ researchers
- ☐ breeders
- ☐ marketing organisations
- ☐ certifiers
- ☐ Others (please specify)
  - .....

**7) Network Members** (more than one possible)

- ☐ farmers
- ☐ advisors
- ☐ researchers
- ☐ marketing organisations
- ☐ certifiers
- ☐ breeders
- ☐ Others (please specify)

.....

**8) Activities of the network** (more than one possible)

- ☐ Exchange of information, dissemination of information
- ☐ Elaboration of improved strategies
- ☐ Others (please specify)

.....

**9) Information dealt within the network** (more than one possible)

- ☐ orchard management
- ☐ varieties and breeding
- ☐ plant health care
- ☐ soil management and fertilisation
- ☐ certification, rules and interpretation (country specific)
- ☐ other subjects (please specify)

.....

**10) Specialised subgroups of the network** (e.g. on varieties, species growing, etc.  
– please specify)

- 1.....
2. ....
- 3.....
- 4.....



**11) Modalities of exchange/dissemination of information** (more than one possible)

- ☐ Group (internal) meetings - “spoken word”
- ☐ Conference/meetings organized by the network (also for exchange with external stakeholders/networks)
- ☐ Participation in conference(s)
- ☐ Public field day
- ☐ Farm visit
- ☐ Newsletter
- ☐ Internal journal of the group
- ☐ Organization of collective information visits to other regions
- ☐ Publication on website
- ☐ Publication in a journal that is not the organ of the group
- ☐ Scientific publications
- ☐ Others (please specify)

.....

**12) Modalities of elaboration of improved strategies** (leave out if this is not applicable)

- ☐ Meetings of research stations and farmers/advisors to discuss research topics
- ☐ Group workshops to discuss strategies to improve best practice
  - ☐ results remain internal
  - ☐ results are communicated
  - ☐ results are recorded
  - ☐ Strategy documents are elaborated
  - ☐ others (please specify)

.....

.....

**13) Connection with other network/s in the country or abroad** (please specify)

.....

.....

.....

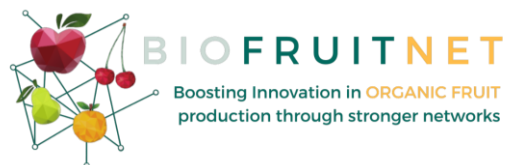

**14) Modalities of funding of the activities** (more than one possible)

- ☐ Fees of members
- ☐ Public money (institutional funding)
- ☐ Public money (project funding)
- ☐ others, please specify.....
